# Supplementary material for: Morphological evolution of ZnO nanostructures and their aspect ratio-induced enhancement in photocatalytic properties
Source: Royal Society of Chemistry journal article supplement (doi:10.1039/c4ra02470b), 2014-06-10
Supplement: c4ra02470b1.pdf [file c4ra02470b1.pdf]

## Morphological evolution of ZnO nanostructures and their aspect ratio induced enhancement in photocatalytic properties

Faheem Ahmed<sup>a</sup>, Nishat Arshi<sup>a</sup>, M.S.Anwar<sup>a</sup>, Rehan Danish<sup>a</sup>, Bon Heun Koo<sup>a\*</sup>

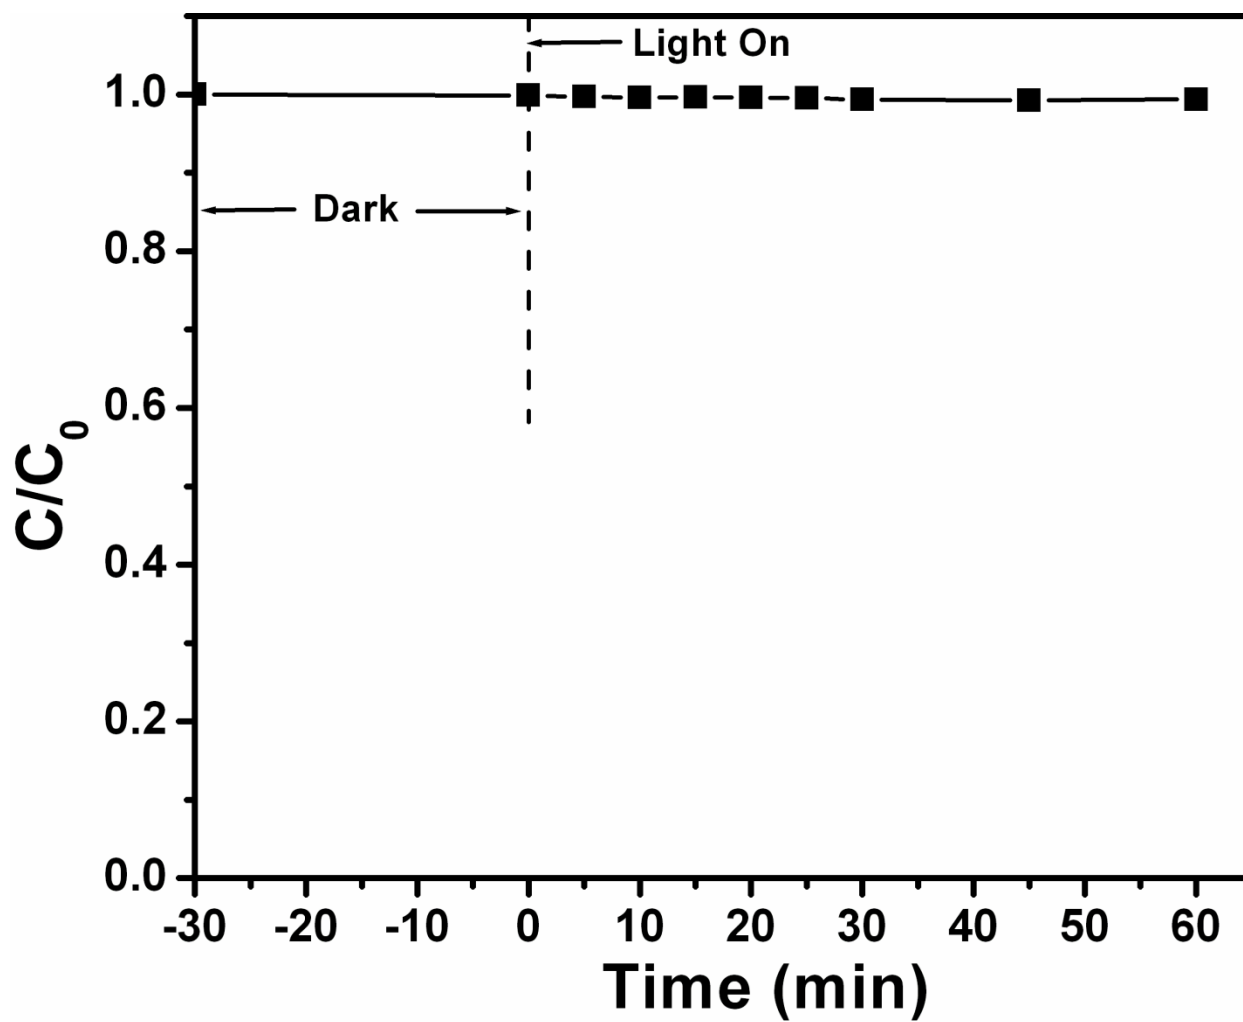

Fig. S1. Blank test (MR without any catalyst under UV light)
